# Supplementary material for: Evolutionary and Medical Consequences of Archaic Introgression into Modern Human Genomes
Source: Genes (Basel). 2018 Jul 18;9(7):358. doi: 10.3390/genes9070358 (PMC6070777; doi:10.3390/genes9070358)
Supplement: Supplementary file 1 [file genes-09-00358-s001.xlsx]

## Sheet: Sheet1
introgression refused by more recent studies or not confirmed
Name of affected genomic region	Genomic information on introgressed variants (SNPs, haplotypes)	Chromosomal and genomic positions of affected regions	chromosome	Result of selection tests (if available)	Archaic origin	Affected populations, frequency (if available)	Medical/phenotypic implication; gene function	Source
Brain, mental activity, neural system
MAP	H2 haplotype within inversion 17q21.31, 1.8Mb	45894382-46028334 (GRCh38.p12)	17	potential positive selection or extraordinary genetic drift	Neanderthal	mainly in Southwest Asia and Southern Europe, 21-32%	Microtubule-associated protein tau supposedly introgressed allele is advantageous in comparison with H1 haplotype playing a role in neurodegenerative disease. Susceptibility locus for diseases with tangles, including progressive supranulear palsy and corticobasal degeneation and possibly including Parkinson dementia complex of Guam. Associated with increased fecundity and higher recombination rat…	[61, 62]	Neanderthal and Denisovan genomes failed to provide evidence of introgressive alleles.
MCPH1	haplogroup D; 8p23.1	6406592 - 6648505 (GRCh38.p12)	8	positive selection of advantageous alleles	Neanderthal	around 70% worldwide; most common in Eurasia, New Guinea and New World populations; much less common within Africa	Gene microcephalin regulates brain size during development, essential role in promoting the proliferation of neural progenitor cells during neurogenesis.	[63]
ASB1	rs75804782; archaic haplotype (hg19): 239316043–239470654	239316043–239470654 (GhRch37/hg19)	2			individuals of British ancestry	Morning or evening person (chronotype), sleep	[54]
EXOC6	rs112294410; archaic haplotype (hg19): 94574048–94756023	94574048–94756023 (GhRch37/hg19)	10			individuals of British ancestry	Daytime dozing or sleeping (narcolepsy)	[54]
GPR26	18 SNPs in a 53kb LD-block, rs77509056, rs34374660, rs17608529, rs17676917, rs17676960, rs17608655, rs17608690, rs117380193, rs59846519, rs4980201, rs75795353, rs150150087, rs143384481, rs4980208, rs80113622, The telomeric end of the gene; rs79867143, rs4980157, rs4980255	125447351–125500316 (GhRch37/hg19)	10		Neanderthal	Individuals of European descend	A G-protein coupled receptor preferentially expressed in the human brain, showed the strong association with brain/skull structure. In determining NeanderScore related changes in brain morphology, two significant cortical regions were found, the intraparietal sulcus (IPS) and primary visual cortex, which both directly underlie the region of skull shape associations. It may play a role in developm…	[64]
RNU6-865З	gene indel; SNP rs13060137, position 100647927 in LD with indel in position 100671648 (GhRch37/hg19)		3		Neanderthal	Europeans (allele frequency = 0.15); East Asians (allele frequency = 0.002)	Suicide attempts in bipolar disorder	[53]
EFCAB5, SSH2, CCDC55	rs9902453	28344276-28389103 (GhRch37/hg19)	17		Neanderthal	Turkish; allele frequency = 0.40625	Addiction	[93]
intergenic	rs13196614		6		Neanderthal	Turkish; allele frequency = 0.25	Migraine	[93]
intergenic	rs10511112	80319980-80428074 (GhRch37/hg19)	3		Neanderthal	Turkish; allele frequency = 0.03125	Migraine	[93]
SOX2-OT	rs4854912	180760431-180798672 (GhRch37/hg19)	3		Neanderthal	Turkish; allele frequency = 0.3125	Neurological	[93]
intergenic	rs1995082	76993424-77038245 (GhRch37/hg19)	16		Neanderthal	Turkish; allele frequency = 0.28125	Neurological	[93]
LOC100509398	rs12639288	167659127-167707035 (GhRch37/hg19)	3		Neanderthal	Turkish; allele frequency = 0.21875	Neurological	[93]
intergenic	rs7379133	2143003-2241764 (GhRch37/hg19)	5		Neanderthal	Turkish; allele frequency = 0.09375	Neurological	[93]
BRWD1	rs2150410	40539790-40587049 (GhRch37/hg19)	21		Neanderthal	Turkish; allele frequency = 0.09375	Neurological	[93]
NR	rs11587682	15293153-150362014 (GhRch37/hg19)	1		Neanderthal	Turkish; allele frequency = 0.09375	Neurological	[93]
SERINC5, KRT18P45	rs71636213	79553250-79612959 (GhRch37/hg19)	5		Neanderthal	Turkish; allele frequency = 0.0625	Neurological	[93]
CECR6, IL17RA	rs971768	17593929-17679377 (GhRch37/hg19)	22		Neanderthal	Turkish; allele frequency = 0.0625	Neurological	[93]
GYPC	rs1550404	127056269-127363088 (GhRch37/hg19)	2		Neanderthal	Turkish; allele frequency = 0.0625	Neurological	[93]
NR	rs17716202	55832939-55917878 (GhRch37/hg19)	5		Neanderthal	Turkish; allele frequency = 0.03125	Neurological	[93]
C4orf22	rs141990949	81240231-81365932 (GhRch37/hg19)	4		Neanderthal	Turkish; allele frequency = 0.03125	Neurological	[93]
KNSTRN	rs78153629	40621842-40708701 (GhRch37/hg19)	15		Neanderthal	Turkish; allele frequency = 0.03125	Neurological	[93]
intergenic	rs17154929	44476107-44803758 (GhRch37/hg19)	10		Neanderthal	Turkish; allele frequency = 0.03125	Neurological	[93]
NTRK2	rs138535351	9q21.33; 84668458-85027070 (GRCh38.p12)	9		Neanderthal	European ancestry (white race)	This gene encodes a neurotrophic tyrosine receptor kinase that regulates neuron survival and differentiation as well as synapse formation. This gene contains a pair of adjacent Neanderthal tag SNPs, which show strong signatures of downregulation. Mutations and polymorphisms in this gene have been associated with a range of neuropsychiatric and neurological disorders including depression, suicide …	[55]
APLNR	rs746885	11q12.1; 57233577-57237453 (GRCh38/hg38)	11	positive selection	Neanderthal	European ancestry (white race)	Apelin receptor gene exhibits strong allele-specific exspression favoring the Neanderthal allele in brain tissues, but ASE favoring the modern human allele in non-brain tissues. Apelin is a signal peptide that influences several aspects of cardiac, digestive, brain, and vascular function, including regulation of oxygen levels. The peptide and its receptor encoded by APLNR have been implicated in …	[55]
CLCN2	Inframe insertion in position 184071131 (GhRch37/hg19)		3		Neanderthal	Europeans (allele frequency = 0.02)	Chloride channel protein 2 (CIC) is a protein that in humans is encoded by the CLCN2 gene. Mutations of this gene have been found to cause leukoencephalopathy (PMID: 23707145) and Idiopathic generalised epilepsy (OMIM: 600699). CLCN2 contains a transmembrane region that is involved in chloride ion transport as well two intracellular copies of the CBS domain. The channel's function is thought to b…	[53]
BAI3	Intronic deletion in position 69910260 (GhRch37/hg19)		6		Neanderthal	Europeans (allele frequency = 0.04); East Asians (allele frequency = 0.17)	This p53-target gene encodes a brain-specific angiogenesis inhibitor, a seven-span transmembrane protein, and is thought to be a member of the secretin receptor family. Brain-specific angiogenesis proteins BAI2 and BAI3 are similar to BAI1 in structure, have similar tissue specificities, and may also play a role in angiogenesis. Receptor that plays a role in the regulation of synaptogenesis and d…	[53]
GRIN2B		13714409-14133022 (GhRch37/hg19)	12		Neanderthal/Denisovan	European	Involved in neurodevelopmental disorders. The C-terminal domains of GRIN2A and GRIN2B (GluN2B) differentially regulate behavioral phenotypes in mice (e.g. impulsivity and anxiety).	[91]
SYNGAP1	108 kb haplotype defined by 20 archaic SNPs in full linkage disequilibrium was found to span SYNGAP1 and nearby genes	33387846-33421466 (GhRch37/hg19)	6	Positive selection	Neanderthal/Denisovan	European	Involved in neurodevelopmental disorders. De novo mutations in SYNGAP1 are thought to represent a relatively common cause of intellectual disability with epilepsy, and most detected changes in affected subjects are loss-of-function mutations	[91]
CUTA	Five SNPs of the introgressed haplotype are reported as eQTLs		6		Neanderthal/Denisovan	European	The archaic SNPs are associated with higher expression level in different brain areas. Regulate the signaling of molecules acting as neurotransmitter, namely acetylcholyne and γ-aminobarbituric acid (GABA) and ffects the folding, oligomerization, and secretion of acetylcholynesterase. CUTA also modulates the generation of β-amyloid peptides (Aβ), major components of senile plaques typical of Alzh…	[91]
PHF1	Five SNPs of the introgressed haplotype are reported as eQTLs		6		Neanderthal/Denisovan	European	The archaic SNPs are associated with higher expression level in different brain areas. Regulate the signaling of molecules acting as neurotransmitter, namely acetylcholyne and γ-aminobarbituric acid (GABA). The PHF1b isoform promotes the transcription of GABRB1, which encodes GABA type A receptor (GABAAR); this results in the regulation of GABA-mediated neurotransmission in the central nervous sy…	[91]
KCNH1		78644634-79397577 (GhRch37/hg19)	1		Neanderthal/Denisovan	European	Involved in neurodevelopmental disorders.	[91]
MAPK1		22113946-22221970 (GhRch37/hg19)	22		Neanderthal/Denisovan	Asian	Involved in neurodevelopmental disorders. Innate immunity signal transducer.	[67, 91]
MAP3K1		56110899-56191978 (GhRch37/hg19)	5		Neanderthal/Denisovan	Asian	Involved in neurodevelopmental disorders. Innate immunity signal transducer.	[67, 91]
MYC		128748314-128753680 (GhRch37/hg19)	8	Positive selection	Neanderthal/Denisovan	Asian	Involved in neurodevelopmental disorders. Selected sites play a role in cancer and/or apoptosis. An interesting possibility to explain these findings is selfish spermatogonial selection: variants that increase the rate of cell division or decrease the probability of apoptosis in a given germline cell are favored, irrespective of the fitness effect on the embryo.	[91]
TBR1		162272619-162281573 (GhRch37/hg19)	2		Neanderthal/Denisovan	Asian	Involved in neurodevelopmental disorders.	[91]
WDR5		137001209-137025094 (GhRch37/hg19)	9		Neanderthal/Denisovan	Asian	Involved in neurodevelopmental disorders.	[91]
ADAMTSL3 (MIM: 609199)	rs12902672, non-synonymous archaic allele: 84706461; archaic haplotype (hg19): 84703470–85114447		15	Positive selection		individuals of British ancestry	Impedance of leg (left); associated eQTLs: brain (amygdala); GWAS phenotype: Schizophrenia; Brain - Amygdala (downregulation).	[54, 89]
ADAMTSL3	rs950169; archaic haplotype: 84641125-85431566 (GhRch37/hg19)		15			European ancestry (white race)	Birth height and schizophrenia risk-associated introgression tag SNP (rs950169) in ADAMTSL3 shows evidence of allele-specific expression mediated by an effect on splicing regulation. The Neanderthal-introgressed (T) allele of this variant is predicted to increase binding of the SRp55 splicing factor compared to the modern human (C) allele and splice out a portion of exon 30 containing the SNP its…	[55]
OAS3	archaic haplotype: 113350796-113444418 (GhRch37/hg19)		12	positive selection	Neanderthal	Europeans (27.8-44.4%); East Asians (15.9-34.7%); South Asians (19.2-34.9%)	Introgressed alleles modify expression of the gene. Archaic alleles in this gene are associated with higher expression in pancreas and vagina. Individuals carrying archaic alleles show down-regulation of this gene in esophagus mucosa and spleen, and in fibroblasts as well as three brain regions (hippocampus, putamen, and caudate nucleus). Brain - Caudate (basal ganglia) (downregulation), Brain – …	[73, 89]
COL13A1	rs17497526; 71580120; archaic haplotype: 71580120-71591034 (GhRch37/hg19).		10	positive selection	Neanderthal	Europeans (7.4–15.3%); East Asians (1.9–5.3%); South Asians (8.2–11.1%)	Individuals carrying the archaic allele show significantly lower expression of COL13A1 in the cerebellum compared to individuals without the introgressed archaic allele. Some studies that have suggested a lower prevalence of Parkinson’s disease in Asia, opening the question of whether the archaic introgression may contribute to Parkinson’s risk in Europeans. GWAS phenotype: Parkinson`s disease. B…	[89]
MMP7	archaic haplotype: 102344970-102353988 (GhRch37/hg19).		11	positive selection	Neanderthal	Europeans, Asians	Nerve - Tibial (downregulation), Vagina (upregulation); accessory molecule in innate immunity	[73, 89]
OAF	archaic haplotype: 120084221-120124302 (GhRch37/hg19).		11	positive selection	Neanderthal		Adipose - Visceral (Omentum) (upregulation), Brain - Caudate (basal ganglia) (upregulation), Brain – Cerebellum (upregulation), Cells - Transformed fibroblasts (upregulation), Muscle – Skeletal (downregulation).	[89]
TRIM29	archaic haplotype: 120084221-120124302 (GhRch37/hg19).		11	positive selection	Neanderthal		Brain – Cortex (upregulation), Pancreas (upregulation), Small Intestine - Terminal Ileum (upregulation), Whole Blood (upregulation).	[89]
OR11A1	archaic haplotype: 29275499-29401057 (GhRch37/hg19).		6	positive selection	Neanderthal		Brain - Putamen (basal ganglia) (upregulation), Testis (downregulation)	[89]
OR12D2	archaic haplotype: 29275499-29401057 (GhRch37/hg19).		6	positive selection	Neanderthal		Brain - Putamen (basal ganglia) (upregulation)	[89]
Immunity
HLA class I genes of the human Major Histocompatibility Comples (MHC)	HLA-A*02	6p22.1; 29942470-29945884 (GRCh38.p12)	6	strong multi-allelic balancing selection	Denisovan	worldwide except Africa	Vital immune system components.
HLA class I genes of the human Major Histocompatibility Comples (MHC)	HLA-A*11:01	6p22.1; 29942470-29945884 (GRCh38.p12)	6	strong multi-allelic balancing selection	Denisovan	Asia, less common in Europe	Vital immune system components. The role in controling NK cells, lymphosytes essential for immune defense and reproduction. T cell-mediated protection against some strains of Epstein-Barr virus (EBV) and in combination with a peptide derived from EBV is one of only two HLA ligands for the KIR3DL2 NK cell receptor. Strongest ligand for KIR2DS4.	[84]
HLA class I genes of the human Major Histocompatibility Comples (MHC)	HLA-A*24:02	6p22.1; 29942470-29945884 (GRCh38.p12)	6	strong multi-allelic balancing selection	archaic group	outside Africa	Vital immune system components. The role in controling NK cells, lymphosytes essential for immune defense and reproduction. Strong Bw4 ligands for KIR3DL1	[84]
HLA class I genes of the human Major Histocompatibility Comples (MHC)	HLA-A*26	6p22.1; 29942470-29945884 (GRCh38.p12)	6	strong multi-allelic balancing selection	Neanderthal	Eurasian and Oceanian populations, later in Africans	Vital immune system components. T cell immunity	[84]
HLA class I genes of the human Major Histocompatibility Comples (MHC)	HLA-A*31:02	6p22.1; 29942470-29945884 (GRCh38.p12)	6	strong multi-allelic balancing selection	archaic group	outside Africa	Vital immune system components. T cell immunity	[84]
HLA class I genes of the human Major Histocompatibility Comples (MHC)	HLA-A*66	6p22.1; 29942470-29945884 (GRCh38.p12)	6	strong multi-allelic balancing selection	Neanderthal	Eurasia	Vital immune system components.	[84]
HLA class I genes of the human Major Histocompatibility Comples (MHC)	HLA-B*07	6p21.33; 31353866-31357245 (GRCh38.p12)	6	strong multi-allelic balancing selection	Neanderthal	Eurasian and Oceanian populations, later in Africans	Vital immune system components. T cell immunity	[84]
HLA class I genes of the human Major Histocompatibility Comples (MHC)	HLA-B*51	6p21.33; 31353866-31357245 (GRCh38.p12)	6	strong multi-allelic balancing selection	Neanderthal	Eurasian and Oceanian populations, later in Africans	Vital immune system components. The role in controling NK cells, lymphosytes essential for immune defense and reproduction. Strong Bw4 ligands for KIR3DL1	[84]
HLA class I genes of the human Major Histocompatibility Comples (MHC)	HLA-B*73:01	6p21.33; 31353866-31357245 (GRCh38.p12)	6	strong multi-allelic balancing selection	Denisovan	west Asia	Vital immune system components. The role in controling NK cells, lymphosytes essential for immune defense and reproduction. It is one of only two HLA-B allotypes carrying the C1 epitope, the ligand for KIR2DL3	[84, 85]: basing on phylogenetic reconstruction there is no enough evidence for introgression.
HLA class I genes of the human Major Histocompatibility Comples (MHC)	HLA-C*7:02	6p21.33; 31268749-31272136 (GRCh38.p12)	6	strong multi-allelic balancing selection	Neanderthal	Eurasia, Oceania, later in Africans; prominenet in Amerindians	Vital immune system components. The role in controling NK cells, lymphosytes essential for immune defense and reproduction. Strong C1 ligand for KIR2DL2/3	[84]
HLA class I genes of the human Major Histocompatibility Comples (MHC)	HLA-C*12:02	6p21.33; 31268749-31272136 (GRCh38.p12)	6	strong multi-allelic balancing selection	Denisovan	Asia with later spreading to Africa	Vital immune system components.	[84]
HLA class I genes of the human Major Histocompatibility Comples (MHC)	HLA-C*15:05	6p21.33; 31268749-31272136 (GRCh38.p12)	6	strong multi-allelic balancing selection	Denisovan	throughout Asia, Oceania and Australia	Vital immune system components.	[84]
HLA class I genes of the human Major Histocompatibility Comples (MHC)	HLA-C*16:02	6p21.33; 31268749-31272136 (GRCh38.p12)	6	strong multi-allelic balancing selection	Neanderthal	west Asia	Vital immune system components.	[84]
KIR	KIR3DS1*013	71573-86270 (GRCh38/hg38)	19	strong multi-allelic balancing selection	Denisovan	common outside Africa, especially in Australia and Oceaniarare sub-Saharan Africans	Vital immune system components. Killer-cell immunoglobulin-like receptors (KIR) of NK cells	[84]
STAT2	haplotype N	12q13.3; 56341597-56360253 (GRCh38/hg38)	12	positive selection, candidates for local adaptation	Neanderthal	Eurasians, 10-fold higher frequency in Melanesians	innate immunity. Key role in interferon signaling pathways. Potential associations with autoimmune disorders	[68]
	rare haplotype D	12q13.3; 56341597-56360253 (GRCh38/hg38)	12		Denisovan	Papuan		[68]
OAS1	7-kb region studied, span of the "deep" lineage introgressed region - around 90 kb	12q24.13; 112906777-112932190 (GRCh38/hg38)	12	candidate for balancing selection and local adaptation	speculative "Ghost" population of Denisova origin admixed with H.erectus	Papuan haplotype is nearly restricted to populations from eastern Indonesia and Melanesia	Encodes for an enzyme (2'-5' oligoadenylate synthetase 1) with an important antiviral function that is involved in the innate immune response. Variants at OAS1 implicated with susceptibility to infectious diseases (e.g., West Nile Fever and severe acute respiratory syndrome [SARS]), severity of Hepatitis C infections and susceptibility to the autoimmune disorder multiple sclerosis.	[69]
OAS1			12			Europeans, Asians	Innate immunity sensor	[73]
OAS2	archaic haplotype: 113350796-113444418 (GhRch37/hg19)		12	positive selection	Neanderthal	Europeans (27.8-44.4%); East Asians (15.9-34.7%); South Asians (19.2-34.9%)	Introgressed alleles modify expression of the gene. Archaic alleles in this gene are associated with higher expression in thyroid. Individuals carrying archaic alleles show down-regulation of this gene in fibroblasts. Cells - Transformed fibroblasts (downregulation), Thyroid (upregulation)	[36, 73, 89]
CCRL2, CCR5, CCR9, CCR1, CCR2, CCR3	rs13098911	46061218-46628253 (GhRch37/hg19)	3		Neanderthal	Turkish; allele frequency = 0.15625	Autoimmune; celiac desease; the haplotype overlaps with the CC motif chemokine receptor (CCR) gene family with a known role in HIV infection; other variants not linked to the Neanderthal haplotype, were associated with autoimmune Behcet’s disease.	[93]
TNPO3	rs12531711, 128617466 (GhRch37/hg19)	128683539-128748326 (GhRch37/hg19)	7	positive selection	Neanderthal	Europeans (8.8–11.6%); East Asians (0-0.5%); South Asians (8.1–21.9%)	Regulatory archaic variant modifies the expression of TNPO3 in brain and is associated with multiple auto-immune phenotypes. GWAS phenotype: Systemic lupus erythematosus, Primary biliary cirrhosis, Systemic sclerosis, Rheumatoid arthritis, Celiac disease and Rheumatoid arthritis, Multiple sclerosis, Systemic lupus erythematosus and Systemic sclerosis; Brain - Caudate (basal ganglia) (upregulation…	[89]
TNPO3, IRF5	rs13239597	128683539-128748326 (GhRch37/hg19)	7		Neanderthal	Turkish; allele frequency = 0.125	Autoimmune	[93]
MUC19, LRRK2	rs11175593	40543545-40651972 (GhRch37/hg19)	12		Neanderthal	Turkish; allele frequency = 0.0625	Autoimmune	[93]
SLIT3	rs12188351	168353129-168521405 (GhRch37/hg19)	5		Neanderthal	Turkish; allele frequency = 0.03125	Autoimmune	[93]
NFATC1, TST	rs7236492	77147840-77248402 (GhRch37/hg19)	18		Neanderthal	Turkish; allele frequency = 0.03125; Europeans	Autoimmune; transcription in innate immunity	[73, 93]
STAT2, IL23A	rs2066819	56627300-56753822 (GhRch37/hg19)	12		Neanderthal	Turkish; allele frequency = 0.03125	Autoimmune	[93]
TOM1	rs138740	35674777-35712614 (GhRch37/hg19)	22		Neanderthal	Turkish; allele frequency = 0.59375	Immune	[93]
NR	rs10504390	66474002-66898457 (GhRch37/hg19)	8		Neanderthal	Turkish; allele frequency = 0.09375	Immune	[93]
PDE4D	rs17444059	58513740-58617539 (GhRch37/hg19)	5		Neanderthal	Turkish; allele frequency = 0.0625	Immune	[93]
NR	rs12530	32774930-32821541 (GhRch37/hg19)	22		Neanderthal	Turkish; allele frequency = 0.0625	Immune	[93]
CEP72	rs4957048	537890-601789 (GhRch37/hg19)	5		Neanderthal	Turkish; allele frequency = 0.15625	Autoimmune	[93]
TPPP	rs4957048	537890-601789 (GhRch37/hg19)	5		Neanderthal	Turkish; allele frequency = 0.15625	Autoimmune	[93]
SLC15A4	rs3765107; archaic haplotype: 129271719-129330378 (GhRch37/hg19).	17q11.2; 30194319-30235968 (GRCh38/hg38)	12		Neanderthal	European ancestry (white race); Asians	The introgressed SNP of lysosomal transporter-encoding gene SLC15A4 associated with systemic lupus erythematosis. GWAS phenotype: Systemic lupus erythematosus; Artery - Aorta (upregulation), Testis (downregulation). SLC15A4 is required for endosomal Toll-like receptor (TLR) signaling and secretion of proinflammatory cytokines by plasmacytoid dendritic cells; downregulation. Innate immunity access…	[55, 73]
IL18	rs5744258, rs1834481, 112023827; archaic haplotype: 112005483-112084109 (GhRch37/hg19)	11q23.1; 112143251-112164117 (GRCh38/hg38)	11	positive selection	Neanderthal	Europeans (16.7-24.5%); East Asians (0-0.5%); South Asians (3.8-11.3%)	interleukin-18 (IL-18) levels (upregulation).The archaic allele is associated with reduced expression of IL18 in multiple tissues, including the pancreas, and IL18 levels/markers of inflammatory response in two GWAS studies. GWAS phenotypes: Interleukin-18 levels, Inflammatory biomarkers; Lung (downregulaiton), Pancreas (downregulation), Skin - Sun Exposed (Lower leg) (downregulation).	[55, 73, 89]
TLR1	rs5743557; archaic haplotype: 38763693-38906951 (GhRch37/hg19); rs4833095	4p14; 38787555-38856817 (GRCh38/hg38)	4	The TLR6-TLR1-TLR10 cluster has been proposed to be a hotspot of positive selection in human and non-human primates and is detected as a strongly supported case of local adaptation in Europeans.	Neanderthal	European ancestry (white race); Asians; CEU: 16%, CHB: 49%	An innate immunity sensor. The Neanderthal haplotype is associated with significantly increased expression of TLR1 (rs5743557). GWAS phenotype: Helicobacter pylori serologic status, Self-reported allergy; Brain - Hippocampus (upregulation), Cells - EBV-transformed lymphocytes (upregulation), Colon - Sigmoid (downregulation), Esophagus - Muscularis (downregulation), Liver (downregulation), Pituita…	[36, 55, 57, 71-73, 89, 101]
AC064874.1	Upstream deletion in position 236693080 (GhRch37/hg19)		2		Neanderthal	East Asians (allele frequency = 0.01)	Immunity	[53]
PRKRA	Intronic deletion in position 179301055 (GhRch37/hg19)		2		Neanderthal	Europeans (allele frequency = 0.02); East Asians (allele frequency = 0.15)	This gene encodes a protein kinase activated by double-stranded RNA which mediates the effects of interferon in response to viral infection. Mutations in this gene have been associated with dystonia.	[53]
MUC7	Haplogroup E bearing unbroken haplotype block of ~20 kb; rs7684907	4q13.3; 70430492-70482997	4	positive selection	Unknown archaic African Hominin population	African	MUC7 encodes one of the most abundant proteins in human saliva. Mucin-7 is a small soluble mucin protein which, like other mucins, harbors subexonic repeat sequences rich in the amino acids proline, threonine, and serine (PTS repeats). PTS repeats are primary targets for O-glycosylation of the protein. Unlike the larger soluble gel-forming mucins, where dense O-glycosylation aids in lubricating m…	[28]
ZNF365	rs7076156, non-synonymous archaic allele: 64415184; archaic haplotype: 64387934-64447352 (GhRch37/hg19)		10	positive selection	Neanderthal	Europeans (23.7-31.5%); East Asians (7.3-14.1%); South Asians (12.2-14.2%)	Carries a non-synonymous allele associated with risk of Crohn’s disease.GWAS phenotype: Crohn`s disease and psoriasis, Crohn`s disease. Cells - EBV-transformed lymphocytes (upregulation).	[89]
IL17F				positive selection	Neanderthal	Europeans, Asians	Innate immunity effector	[36, 73]
CLEC3A				positive selection	Neanderthal	Europeans, Asians	Innate immunity sensor	[36, 73]
SRMS					Neanderthal	Europeans, Asians	Innate immunity regulator	[73]
PTK6					Neanderthal	Europeans, Asians	Innate immunity regulator	[73]
IFITM2	MIM: 604456				Neanderthal	Europeans, Asians	Innate immunity effector. A family of restriction factors that restrict the replication of multiple viruses in vitro, including influenza A, dengue, and West Nile.	[73]
IFITM1	MIM: 605578				Neanderthal	Europeans, Asians	Innate immunity effector. A family of restriction factors that restrict the replication of multiple viruses in vitro, including influenza A, dengue, and West Nile.	[73]
IFITM3	MIM:605579				Neanderthal	Europeans	Innate immunity effector. A family of restriction factors that restrict the replication of multiple viruses in vitro, including influenza A, dengue, and West Nile. Variation at IFITM3 has been suggested to alter the morbidity and mortality associated with influenza infection in humans.	[73]
PRKCQ					Neanderthal	Europeans	Innate immunity signal transducer	[73]
ACTR2					Neanderthal	Europeans	Innate immunity	[73]
AVP					Neanderthal	Europeans, Asians	Innate immunity	[73]
ARRB2					Neanderthal	Europeans	Innate immunity regulator	[73]
ITPR3					Neanderthal	Europeans	Innate immunity	[73]
ITPR2					Neanderthal	Europeans	Innate immunity	[73]
TLR1					Neanderthal	Europeans	Innate immunity sensor	[73]
EPRS					Neanderthal	Europeans	Innate immunity regulator	[73]
NLRP6					Neanderthal	Europeans	Innate immunity sensor	[73]
MAVS					Neanderthal	Europeans	Innate immunity adaptor	[73]
FCGR2A					Neanderthal	Europeans	Innate immunity sensor	[73]
KAT2B					Neanderthal	Europeans	Innate immunity	[73]
TRIML1					Neanderthal	Europeans	Innate immunity regulator	[73]
KRAS					Neanderthal	Europeans	Innate immunity signal transducer	[73]
FCGR2B					Neanderthal	Europeans	Innate immunity sensor	[73]
TLR2					Neanderthal	Europeans	Innate immunity sensor	[73]
DDX21					Neanderthal	Europeans	Innate immunity adaptor	[73]
MMP12					Neanderthal	Europeans	Innate immunity effector	[73]
FOS					Neanderthal	Europeans, Asians	Innate immunity transcription	[73]
CLEC11A					Neanderthal	Europeans	Innate immunity sensor	[73]
BIRC5					Neanderthal	Europeans	Innate immunity regulator	[73]
SLAMF8					Neanderthal	Europeans	Innate immunity sensor	[73]
MAP1LC3C					Neanderthal	Europeans, Asians	Innate immunity effector	[73]
PRF1					Neanderthal	Europeans	Innate immunity effector	[73]
PLA2R1					Neanderthal	Europeans	Innate immunity sensor	[73]
NOXA1					Neanderthal	Europeans	Innate immunity effector	[73]
PRKCG					Neanderthal	Europeans, Asians	Innate immunity signal transducer	[73]
ACAP1					Neanderthal	Europeans, Asians	Innate immunity	[73]
ELANE					Neanderthal	Europeans	Innate immunity regulator	[73]
LY75					Neanderthal	Europeans	Innate immunity sensor	[73]
TNFSF9					Neanderthal	Europeans	Innate immunity effector	[73]
PRTN3					Neanderthal	Europeans	Innate immunity adaptor	[73]
HSP90AB1					Neanderthal	Europeans, Asians	Innate immunity accessory molecule	[73]
TRIB3					Neanderthal	Europeans	Innate immunity regulator	[73]
IRF2					Neanderthal	Europeans	Innate immunity transcription	[73]
CD80					Neanderthal	Europeans	Innate immunity effector	[73]
PPARGC1B					Neanderthal	Europeans	Innate immunity signal transducer	[73]
ATF3					Neanderthal	Europeans, Asians	Innate immunity transcription	[73]
AQP3					Neanderthal	Europeans	Innate immunity	[73]
CLEC2L					Neanderthal	Europeans, Asians	Innate immunity sensor	[73]
ERAP1					Neanderthal	Europeans	Innate immunity	[73]
CXCL16					Neanderthal	Europeans	Innate immunity effector	[73]
TXN					Neanderthal	Europeans, Asians	Innate immunity regulator	[36, 73]
CD209					Neanderthal	Europeans	Innate immunity sensor	[89]
TNK1					Neanderthal	Europeans	Innate immunity signal transducer	[89]
CLEC4G					Neanderthal	Europeans	Innate immunity sensor	[89]
TNFRSF13B					Neanderthal	Europeans	Innate immunity secondary receptor	[89]
HSP90B1					Neanderthal	Europeans, Asians	Innate immunity accessory molecule	[89]
ART1					Neanderthal	Europeans	Innate immunity	[89]
BTN3A3					Neanderthal	Europeans	Innate immunity sensor	[89]
CD302					Neanderthal	Europeans	Innate immunity sensor	[89]
CAMKK2					Neanderthal	Europeans	Innate immunity signal transducer	[89]
JAK3					Neanderthal	Europeans	Innate immunity signal transducer	[89]
CTSH					Neanderthal	Asians	Innate immunity accessory molecule	[89]
NLRC5	MIM: 613537				Neanderthal	Asians	Innate immunity sensor	[89]
BCL2A1					Neanderthal	Asians	Innate immunity regulator	[89]
IL17A					Neanderthal	Asians	Innate immunity effector	[89]
TRIM32					Neanderthal	Asians	Innate immunity regulator	[89]
IGF1					Neanderthal	Asians	Innate immunity effector	[89]
NRIP1					Neanderthal	Asians	Innate immunity transcription	[89]
GJA1					Neanderthal	Asians	Innate immunity	[89]
EGF					Neanderthal	Asians	Innate immunity effector	[89]
CDKN2A					Neanderthal	Asians	Innate immunity regulator	[89]
DUSP16					Neanderthal	Asians	Innate immunity regulator	[89]
APAF1					Neanderthal	Asians	Innate immunity transducer	[89]
KRT1					Neanderthal	Asians	Innate immunity regulator	[89]
SYK					Neanderthal	Asians	Innate immunity adaptor	[89]
GRK5					Neanderthal	Asians	Innate immunity regulator	[89]
CAMK2D					Neanderthal	Asians	Innate immunity	[89]
NXN					Neanderthal	Asians	Innate immunity signal transducer	[89]
TP73					Neanderthal	Asians	Innate immunity transcription	[89]
TRIM62					Neanderthal	Asians	Innate immunity regulator	[89]
CCR4					Neanderthal	Asians	Innate immunity secondary receptor	[89]
TRIM71					Neanderthal	Asians	Innate immunity regulator	[89]
MT2A					Neanderthal	Asians	Innate immunity	[89]
EYA4					Neanderthal	Asians	Innate immunity regulator	[89]
IFNA1					Neanderthal	Asians	Innate immunity effector	[89]
IFNA8					Neanderthal	Asians	Innate immunity effector	[89]
IFNE					Neanderthal	Asians	Innate immunity effector	[89]
POLR2E					Neanderthal	Asians	Innate immunity sensor	[89]
BDKRB2					Neanderthal	Asians	Innate immunity sensor	[89]
TRIM29					Neanderthal	Asians	Innate immunity regulator	[89]
SOS1					Neanderthal	Asians	Innate immunity regulator	[89]
BCL3					Neanderthal	Asians	Innate immunity signal transducer	[89]
CFI					Neanderthal	Asians	Innate immunity regulator	[89]
IFNA2					Neanderthal	Asians	Innate immunity effector	[89]
SMAD6					Neanderthal	Asians	Innate immunity signal transducer	[89]
CD22					Neanderthal	Asians	Innate immunity regulator	[89]
PPP3R1					Neanderthal	Asians	Innate immunity signal transducer	[89]
REG3G					Neanderthal	Asians	Innate immunity sensor	[89]
SPINK5					Neanderthal	Asians	Innate immunity adaptor	[89]
IFIT5					Neanderthal	Asians	Innate immunity sensor	[89]
IRF6					Neanderthal	Asians	Innate immunity transcription	[89]
SIRT1	MIM: 607199				Neanderthal	Asians	Innate immunity	[89]
Cell development and regulation
ERBB3	MIM 190151	12q13.2; 56080025-56103507 (GRCh38/hg38)	12		Neanderthal		The variant within ERBB3 intracellular domain of the tyrosine-kinase-type cell-surface receptor ERBB3. ERBB3 and ERBB2 form a heterodimer that plays an important role in cell growth, survival, and differentiation and in the suppression of apoptosis	[68]
ESYT1	STAT2, ERBB3 and ESYT1 constitute haplotype of 250 Kb	12q13.2; 56118250-56144676 (GRCh38/hg38)	12		Neanderthal		ESYT1, which has ubiquitous expression, encodes for the extended synaptotagmin-like protein 1 (ESYT1), a type I transmembrane protein. The expression of ESYT1 is dramatically induced during differentiation of fibroblasts into adipocytes.	[68]
PTHLH	rs10771399	28130906-28182252 (GhRch37/hg19)	12		Neanderthal	Turkish; allele frequency = 0.21875	Cancer	[93]
NR	rs76010824	67439555-67488793 (GhRch37/hg19)	3		Neanderthal	Turkish; allele frequency = 0.1875	Cancer	[93]
WNT4, CDC42	rs72647484	22534050-22641007 (GhRch37/hg19)	1		Neanderthal	Turkish; allele frequency = 0.03125	Cancer	[93]
SHPRH	frame shift insertion in position 146185477 (GhRch37/hg19)		6		Neanderthal	East Asians (allele frequency = 0.05)	SHPRH is a ubiquitously expressed protein that contains motifs characteristics of several DNA repair proteins, transcription factors, and helicases.	[53]
DDTL	frame shift deletion in position 24313530 (GhRch37/hg19)		22		Neanderthal	Europeans (allele frequency = 0.002); East Asians (allele frequency = 0.03)	DDTL (D-Dopachrome Tautomerase Like) is a Protein Coding gene. Gene Ontology (GO) annotations related to this gene include lyase activity.	[53]
MAB21L2	Downstream deletion in position 151508852 (GhRch37/hg19)		4		Neanderthal	Europeans (allele frequency = 0.004)	This gene is similar to the C. elegans MAB-21 cell fate-determining gene, a downstream target of transforming growth factor-beta signaling. It is thought that this gene may be involved in neural development. The protein encoded by this gene is primarily nuclear, although some cytoplasmic localization has been observed. MAB21L2 (Mab-21 Like 2) is a Protein Coding gene. Diseases associated with MAB…	[53]
LINC01116	Upstream insertion in position 177503917 (GhRch37/hg19)		2		Neanderthal	East Asians (allele frequency = 0.004)	LINC01116 (Long Intergenic Non-Protein Coding RNA 1116) is an RNA Gene, and is affiliated with the non-coding RNA class; supposedly associated with prostate and breast cancer.	[53]
RABEP2	Downstream insertion in position 28915046 (GhRch37/hg19)		16		Neanderthal	East Asians (allele frequency = 0.01)	RABEP2 (Rabaptin, RAB GTPase Binding Effector Protein 2) is a Protein Coding gene. Gene Ontology (GO) annotations related to this gene include GTPase activator activity and growth factor activity. Plays a role in membrane trafficking and in homotypic early endosome fusion.	[53]
CHPT1	Downstream deletion in position 102125452 (GhRch37/hg19)		12		Neanderthal	Europeans (allele frequency = 0.008); East Asians (allele frequency = 0.3)	CHPT1 (Choline Phosphotransferase 1) is a Protein Coding gene. Among its related pathways are Glycerophospholipid biosynthesis and Metabolism. Gene Ontology (GO) annotations related to this gene include diacylglycerol binding and diacylglycerol cholinephosphotransferase activity. Catalyzes phosphatidylcholine biosynthesis from CDP-choline. It thereby plays a central role in the formation and main…	[53]
CSMD1	Intronic deletion in position 4762649 (GhRch37/hg19)		8		Neanderthal	Europeans (allele frequency = 0.003); East Asians (allele frequency = 0.09)	CSMD1 CUB and Sushi multiple domains 1 is a protein that in humans is encoded by the CSMD1 gene. CUB is a structural motif. It is a potential tumour suppressor, the deletion of which may result in head and neck carcinomas behaving more aggressively.	[53]
CSMD1		8p23.2; 2935352-4995034 (GRCh38/hg38)	8		Unknown archaic African Hominin population	African	CSMD1 CUB and Sushi multiple domains 1 is a protein that in humans is encoded by the CSMD1 gene. CUB is a structural motif. It is a potential tumour suppressor, the deletion of which may result in head and neck carcinomas behaving more aggressively.	[27]
PDE4D	Intronic deletion in position 58519627 (GhRch37/hg19)		5		Neanderthal	Europeans (allele frequency = 0.004); East Asians (allele frequency = 0.05)	The encoded protein has 3',5'-cyclic-AMP phosphodiesterase activity and degrades cAMP, which acts as a signal transduction molecule in multiple cell types. This gene uses different promoters to generate multiple alternatively spliced transcript variants that encode functional proteins. Hydrolyzes the second messenger cAMP, which is a key regulator of many important physiological processes.	[53]
PAX3	intronic insertion in position 223154225 (GhRch37/hg19)		2		Neanderthal	Europeans (allele frequency = 0.001); East Asians (allele frequency = 0.001)	This gene is a member of the paired box (PAX) family of transcription factors. Members of this gene family typically encode proteins which contain a paired box domain, an octapeptide, and a paired-type homeodomain.	[53]
WWOX	Intronic deletion in position 79076425 (GhRch37/hg19)		16		Neanderthal	Europeans (allele frequency = 0.05); East Asians (allele frequency = 0.001)	Putative oxidoreductase. Acts as a tumor suppressor and plays a role in apoptosis. Required for normal bone development (By similarity). May function synergistically with p53/TP53 to control genotoxic stress-induced cell death. Plays a role in TGFB1 signaling and TGFB1-mediated cell death. May also play a role in tumor necrosis factor (TNF)-mediated cell death. Inhibits Wnt signaling, probably by…	[53]
Metabolism
CHMP4BP1	gene indel; SNP rs17673930, position 55808151 in LD with indel in position 55769446 (GhRch37/hg19)		14		Neanderthal	Europeans (allele frequency = 0.08); East Asians (allele frequency = 0.006)	Protein biomarker	[53]
UBE2E2	gene indel; SNP rs17013049, position 23385942 in LD with indel in position 23386162 (GhRch37/hg19)		3		Neanderthal	Europeans (allele frequency = 0.02); East Asians (allele frequency = 0.11)	Type 2 diabetes	[53]
intergenic indel	SNP rs35640669, position 87177586 in LD with indel in position 87171753 (GhRch37/hg19)		9		Neanderthal	Europeans (allele frequency = 0.03); East Asians (allele frequency = 0.05)	Insulin-related traits	[53]
EGLN1		231457651-231657496 (GhRch37/hg19)	1	positive selection candidate	Denisovan	Tibetian	Tibetan-specific EGLN1 haplotype encoding PHD2 which abrogates HIF augmentation in hypoxia.	[75, 77]
EPAS1	32.7kb haplotype block in th egene and 150kb 3' region of EPAS1	46533376-46792633 (GhRch37/hg19)	2	positive selection candidate	Denisovan	Tibetian	Protection from hypoxia-induced polycythemia, and a haplotype of EPAS1, encoding hypoxia-inducible factor (HIF-2α), has been associated with lower hemoglobin levels.	[75-77]
PTGIS		20q13.13; 49503874-49568170 (GRCh38/hg38)	20	positive selection candidate	Denisovan	Tibetian	Associated with three hypoxia-response GO terms (0071456, 0036294,0071453) and regulated by hypoxiainducible factor 1 (HIF-1). PTGIS encodes prostaglandin I2 synthase, which participates in the synthesis of prostanoid.	[75]
VDR		48257328-48357328 (GhRch37/hg19)	12	positive selection candidate	Denisovan	Tibetian	Encodes the vitamin D3 receptor. Mutations in this gene can cause an abnormality in vitamin D metabolism, which may in turn lead to rickets and preterm birth.	[75]
KCTD12			2	positive selection candidate	Denisovan	Tibetian	Potassium channel tetramerization domain containing 12, a component of the G-protein-coupled receptors for γ-aminobutyric acid (GABA) receptor.	[75]
SLCO1B1	rs11045818	21303439-21372344 (GhRch37/hg19)	12		Neanderthal	Turkish; allele frequency = 0.09375	Drug	[93]
ADAMTS18	rs12935229	77287936-77338208 (GhRch37/hg19)	16		Neanderthal	Turkish; allele frequency = 0.125	Drug	[93]
ARID5B, RTKN2	rs7912580	63914890-63960611 (GhRch37/hg19)	10		Neanderthal	Turkish; allele frequency = 0.0625	Drug	[93]
LIMK2	rs2106294	31638027-31701821 (GhRch37/hg19)	22		Neanderthal	Turkish; allele frequency = 0.3125	Metabolism	[93]
SLCO1B1	rs12829704	21384382-21411854 (GhRch37/hg19)	12		Neanderthal	Turkish; allele frequency = 0.125	Metabolism	[93]
CYP2C9	rs2185570	96675093-96824260 (GhRch37/hg19)	10		Neanderthal	Turkish; allele frequency = 0.125	Metabolism	[93]
IFNGR1	rs13201877	137625741-137689061 (GhRch37/hg19)	6		Neanderthal	Turkish; allele frequency = 0.09375	Metabolism; associated with Body Mass Index (BMI)	[93]
DIP2C	rs877282	722732-822757 (GhRch37/hg19)	10		Neanderthal	Turkish; allele frequency = 0.09375	Metabolism	[93]
PTDSS2, RNH1, HRAS	rs10540	457879-539058 (GhRch37/hg19)	11		Neanderthal	Turkish; allele frequency = 0.0625; 7% and 11% in European populations; only rarely in East Asian	Metabolism; associated with Body Mass Index (BMI); RNH1 is an RNAse inhibitor and has been shown to regulate angiogenin; HRAS is a well- studied proto-oncogene, developmentally important with variants associated with the Costello syndrome and myopathy with excess of muscle spindles; PTDSS2 is the main enzyme in the biosynthesis of phosphatidylserine, which accounts for up to 10% of cell membrane …	[93]
AF086303	rs72960926	75148132-75289753 (GhRch37/hg19)	6		Neanderthal	Turkish; allele frequency = 0.03125	Metabolism	[93]
YIPF1	rs11206226	54256324-54340621 (GhRch37/hg19)	1		Neanderthal	Turkish; allele frequency = 0.1875	Metabolism	[93]
TBX15/WARS2	introgressed haplotype position: 119541452-119627434 (GhRch37/hg19); SNPs: rs2298080, rs10923735, rs12030972, rs12026409, rs10923726, rs4659140, rs12027501, rs12027524, rs12410034, rs12410034, rs4658995, rs1325932, rs1325931, rs1325930, rs10923730, rs963171, rs3951792, rs12024063, rs12031562, rs12031597, rs12021830, rs10923733, rs10494218, rs10494219, rs12402563, rs12405154, rs12025128, rs1133898…		1	positive selection	Denisovan-like	East Asians 48.41%; Europeans 19.78%; South Asians 12.73%; Greenlanders 99.74%; Native Americans 98%	The TBX15/WARS2 region is highly pleiotropic: it has been found to be associated with a variety of traits. These include the differentiation of adipose tissue , body fat distribution, facial morphology, stature, ear morphology, hair pigmentation, and skeletal development. WARS2 encodes the mitochondrial tryptophanyl-tRNA synthetase. TBX15 is a transcription factor from the T-box family and is a h…	[65]
ACOT4	frame shift insertion in position 74060511 (GhRch37/hg19)		14		Neanderthal	Europeans (allele frequency = 0.006)	Acyl-CoA thioesterases, such as ACOT4, hydrolyze acyl-CoAs to the free fatty acid and CoA. ACOTs therefore play key roles in maintaining the intracellular ratio between CoA esters of various lipids and free fatty acids	[53]
IGLV3-27	frame shift deletion in position 23011159 (GhRch37/hg19)		22		Neanderthal	East Asians (allele frequency = 0.01)	V region of the variable domain of immunoglobulin light chains that participates in the antigen recognition	[53]
NUAK2	Upstream deletion in position 205293177 (GhRch37/hg19)		1		Neanderthal	Europeans (allele frequency = 0.008); East Asians (allele frequency = 0.002)	NUAK2 (NUAK Family Kinase 2) is a Protein Coding gene. Among its related pathways are Cytoskeletal Signaling and Glucose / Energy Metabolism. Gene Ontology (GO) annotations related to this gene include transferase activity, transferring phosphorus-containing groups and protein tyrosine kinase activity. Stress-activated kinase involved in tolerance to glucose starvation. Induces cell-cell detachme…	[53]
STARD3	Inframe deletion in position 37815323 (GhRch37/hg19)		17		Neanderthal	Europeans (allele frequency = 0.003)	StAR-related lipid transfer domain protein 3 ( STARD3 ) also known as metastatic lymph node 64 protein ( MLN64 ) is a late endosomal integral membrane protein involved in cholesterol transport.	[53]
DDX60L	rs17612333; 169330384; archaic haplotype: 169300451-169340431 (GhRch37/hg19).		4	positive selection	Neanderthal	Native Americans; Europeans (12.6-20.7%); East Asians (10.4–14.4%); South Asians (7.5-14.6%)	The archaic allele is associated with reduced expression of DDX60L in subcutaneous adipose tissue and an increased body mass index (BMI). Adipose - Subcutaneous (downregulation), Heart - Atrial Appendage (downregulation), Pituitary (dowregulaiton)	[89]
DNAJC13	archaic haplotype: 132119691-132421998 (GhRch37/hg19).		3		Neanderthal		GWAS phenotype: LDL cholesterol, HDL cholesterol; Brain - Putamen (basal ganglia) (downregulation).	[89]
BCHE	archaic haplotype: 165476224-165603543 (GhRch37/hg19).		3		Neanderthal		GWAS phenotype: Butyrylcholinesterase levels; Adipose - Subcutaneous (downregulation), Skin - Not Sun Exposed (Suprapubic) (downregulation), Thyroid (downregulation).	[89]
KIAA1919	archaic haplotype: 111415836-111951212 (GhRch37/hg19).		6		Neanderthal		GWAS phenotype: Metabolite levels; Adrenal Gland (downregulation), Colon - Sigmoid (downregulation), Esophagus – Muscularis (downregulation), Heart - Atrial Appendage (downregulation), Heart - Left Ventricle (downregulation), Liver (downregulation), Lung (downregulation), Pancreas (downregulation), Thyroid (downregulation).	[89]
SLC16A10	archaic haplotype: 111415836-111951212 (GhRch37/hg19).		6		Neanderthal		GWAS phenotype: Metabolite levels; Brain - Anterior cingulate cortex (BA24) (downregulation)	[89]
SULT2A1	archaic haplotype: 48332914-48465312 (GhRch37/hg19).		19		Neanderthal		GWAS phenotype: Dehydroepiandrosterone sulphate levels; Adrenal Gland (downregulation)	[89]
REV3L	non-synonymous archaic allele: 111628626 (GhRch37/hg19).		6	positive selection	Neanderthal		GWAS phenotype: Metabolite levels	[89]
CYP2C8	non-synonymous archaic allele: 96798749 (GhRch37/hg19).		10		Neanderthal		GWAS phenotype: Acenocoumarol maintenance dosage	[89]
Digestive system
OR12D3	archaic haplotype: 29275499-29401057 (GhRch37/hg19).		6	positive selection	Neanderthal		Esophagus - Mucosa (upregulation)	[89]
Muscle
distrophin	8-kb segment of dys44 haplotypes on Xp21.2-p21.1; 31119219-33339609 (GRCh38.p12)	Xp21.2-p21.1; 31119219-33339609 (GRCh38.p12)	X		archaic Homo	sub-Saharan Africans	Dystrophin is a rod-shaped cytoplasmic protein, and a vital part of a protein complex that connects the cytoskeleton of a muscle fiber to the surrounding extracellular matrix through the cell membrane. Duchenne (DMD) and Becker muscular dystrophy are caused by mutations in the dystrophin (dys) gene.	[25]
TMEM123	archaic haplotype: 102344970-102353988 (GhRch37/hg19).		11	positive selection	Neanderthal		Colon - Transverse (upregulation), Heart - Left Ventricle (upregulation), Muscle - Skeletal (upregulation).	[89]
POU2F3	archaic haplotype: 120084221-120124302 (GhRch37/hg19).		11	positive selection	Neanderthal		Esophagus – Muscularis (downregulation), Heart - Left Ventricle (downregulation)	[89]
NFKBIE	non-synonymous archaic allele: 44232977; archaic haplotype: 44228815-44282897 (GhRch37/hg19).		6	positive selection	Neanderthal	Europeans, Asians	GWAS phenotype: Rheumatoid arthritis; Colon - Transverse (downregulation), Pancreas (downregulation). Innate immunity signal traducer.	[73, 89]
Hair color
SPIRE2	rs62052168; archaic haplotype (hg19): 89813988–90008296		16			individuals of British ancestry	Hair color; associated eQTLs: muscle (skeletal), heart (atrial appendage), adipose (visceral; omentum); skin (not sun exposed; suprapubic), minor salivary gland, esophagus (muscularis), esophagus (mucosa), esophagus (gastresophageal junction), testis, skin (sun exposed; lower leg), adipose (subcutaneous), nerve (tibial), artery (tibial), heart (left ventricle), cells (transformed fibroblasts), ar…	[54]
MC1R	rs62052168; archaic haplotype (hg19): 89813988–90008296		16			individuals of British ancestry	Hair color; associated eQTLs: breast (mammary tissue)	[54]
FANCA	rs62052168; archaic haplotype (hg19): 89813988–90008296		16			individuals of British ancestry	Hair color; associated eQTLs: muscle (skeletal), lung, pancreas, esophagus (muscularis), adipose (subcutaneous), nerve (tibial), artery (tibial), whole blood	[54]
TCF25	rs62052168; archaic haplotype (hg19): 89813988–90008296		16			individuals of British ancestry	Hair color; associated eQTLs: uterus, brain (putamen; basal ganglia)	[54]
TUBB3	rs62052168; archaic haplotype (hg19): 89813988–90008296		16			individuals of British ancestry	Hair color; associated eQTLs: vagina, esophagus (mucosa)	[54]
SLC24A4	rs77004437; archaic haplotype (hg19): 92767097–92801297		14			individuals of British ancestry; Europeans	Hair color; associated eQTLs: muscle (skeletal). Innate immunity accessory molecule.	[54, 73]
EXOC2	rs71550011; archaic haplotype (hg19): 503851–544833		6			individuals of British ancestry	Hair color; associated eQTLs: cells (transformed fibroblasts)	[54]
Skin color
MC1R	loss-of-function allele Val92Met, rs2228479*A, chr16q24.3, gene span 3099bp		16	Possible local adaptation of modern Eurasians to sunlight intensity	Neanderthal	Europeans (around 5%); East Asians (around 30%); Taiwanese aborigines (60-70%)	Red hairness, associated with pain sensitivity in women, making them particularly prone to colorectal, cervical, uterine, and ovarian cancer. It is suspected to alter the a-helix structure of the second transmembrane domain of MC1R. In vitro study found that the Val92Met variant could reduce the affinity of MC1R to a-MSH by approximately 5-fold, suggesting that the Val92Met variant alters normal …	[66, 67]
RUNX2	rs115127056; archaic haplotype (hg19): 45533261–45680205		6			individuals of British ancestry	Skin color; associated eQTLs: brain (cerebellum), brain (hippocampus), brain (cerebellar hemisphere)	[54]
BNC2	rs10962612; archaic haplotype (hg19): 16720122–16804167		9	positive selecion, local adaptation	Neanderthal	individuals of British ancestry	Ease of skin tanning; incidence of childhood sunburn; associated eQTLs: muscle (skeletal)	[36, 54]
BNC2*	rs62543578; archaic haplotype (hg19): 16891561–16915874		9	positive selection, local adaptation	Neandertal	individuals of British ancestry	skin color	[54]
CHORDC1*	rs74918882; archaic haplotype (hg19): 89996325–90041511		11			individuals of British ancestry	skin color	[54]
OAS1	archaic haplotype: 113350796-113444418 (GhRch37/hg19)		12	positive selection	Neanderthal	Europeans (27.8-44.4%); East Asians (15.9-34.7%); South Asians (19.2-34.9%)	Introgressed alleles modify expression of the gene. Archaic alleles in this gene are associated with higher expression in subcutaneous adipose tissue and sun-exposed skin. Individuals carrying archaic alleles show down-regulation of this gene in esophagus mucosa and spleen. Adipose – Subcutaneous (upregulation), Esophagus – Mucosa (downregulation), Skin - Sun Exposed (Lower leg) (upregulation), S…	[89]
Height
ZNF536	rs56199929; archaic haplotype (hg19): 30982165–31041053		19			individuals of British ancestry	Comparative height size at age 10 years; early life factors	[54]
SGCD	rs157350; position: 156038821-156180806		5		Neanderthal	Turkish; allele frequency = 0.03125	Anthropometric	[93]
STAT2	non-synonymous archaic allele: 56740682; archaic haplotype: 56623347-56753822 (GhRch37/hg19)		12	Positive selection			GWAS phenotype: Height; Liver (upregulated)	[89]
Cardio-vascular system; blood
GJA1* (MIM:121014)	rs55913590; archaic haplotype (hg19): 121910814–122062861		6			individuals of British ancestry	Pulse rate; blood pressure.	[54]
GOLGA6L4	rs12902672; archaic haplotype (hg19): 84703470–85114447		15			individuals of British ancestry	Impedance of leg (left); associated eQTLs: small intestine (terminal ileum)	[54]
intergenic indel	SNP rs1016646, position 20263408 in LD with indel in position 20253488 (GhRch37/hg19)		8		Neanderthal	Europeans (allele frequency = 0.06); East Asians (allele frequency = 0.09)	Preeclampsia	[53]
HBB	rs12788102; position: 4572048-4848163		11		Neanderthal	Turkish; allele frequency = 0.1875	Blood; the variant strongly associated with severity of malaria and thiss haplotype overlaps with multiple olfactory receptor 5 (OR5) subfamily genes.	[93]
BCL11B	Upstream deletion in position 99742823 (GhRch37/hg19)		14		Neanderthal	East Asians (allele frequency = 0.01)	B-cell lymphoma/leukemia 11B is a protein that in humans is encoded by the BCL11B gene. This gene encodes a C2H2-type zinc finger protein and is closely related to BCL11A, a gene whose translocation may be associated with B-cell malignancies. The specific function of this gene has not yet been determined, but it could also be involved in some malignancies.	[53]
OR5V1	archaic haplotype: 29275499-29401057 (GhRch37/hg19).		6	positive selection	Neanderthal		Artery – Tibial (upregulation), Brain - Substantia nigra (upregulation), Heart - Atrial Appendage (upregulation), Heart - Left Ventricle (upregulation), Nerve – Tibial (upregulation), Testis.	[89]
OR14J1	archaic haplotype: 29275499-29401057 (GhRch37/hg19).		6	positive selection	Neanderthal		Heart - Left Ventricle (upregulation), Nerve - Tibial (upregulation)	[89]
RPH3A	archaic haplotype: 113350796-113444418 (GhRch37/hg19).		12	positive selection	Neanderthal		Artery – Tibial (upregulation)	[89]
NME7	archaic haplotype: 169133273-169453703 (GhRch37/hg19).		1		Neanderthal		GWAS phenotype: Venous thromboembolism; Colon – Sigmoid (upregulation), Lung (upregulation)	[89]
LRRC16A	archaic haplotype: 25319900-25408104 (GhRch37/hg19).		6		Neanderthal		GWAS phenotype: other erythrocyte phenotypes; Red blood cell traits; Cells - Transformed fibroblasts (upregulation), Ovary (downregulation).	[89]
DDC	archaic haplotype: 50482629-50575975 (GhRch37/hg19).		7		Neanderthal		GWAS phenotype: Acute lymphoblastic leukemia (B-cell precursor); Acute lymphoblastic leukemia (childhood); Brain - Cerebellar Hemisphere (upregulation) Muscle - Skeletal (downregulation), Testis (upregulation).	[89]
IPO7	archaic haplotype: 9374407-9498746 (GhRch37/hg19).		11		Neanderthal		GWAS phenotype: Blood pressure, Interleukin levels (IL10, IL1Ra, IL6), in plasma; Cells - EBV-transformed lymphocytes (downregulation).	[89]
PRKCH	non-synonymous archaic allele: 61924239 (GhRch37/hg19).		14	positive selection	Neanderthal		GWAS phenotype: Stroke	[89]
Vision
PBLD (MIM:612189)	rs12571093; archaic haplotype (hg19): 70009572–70059496		10			individuals of British ancestry; Turkish (allele frequency =0.1875)	Vision; Sitting height (body-size measures); associated eQTLs: muscle (skeletal), brain (cortex), brain (caudate; basal ganglia), brain (putamen; basal ganglia)	[54, 93]
KCNT2	gene indel; SNP rs16839886, positon 196376474 in LD with indel in position 196365 712 (GhRch37/hg19)		1		Neanderthal	Europeans (allele frequency = 0.07); East Asians (allele frequency = 0.01)	Age-related macular degeneration	[53]
intergenic	rs13201929; 117605912-117789914 (GhRch37/hg19)	117605912-117789914 (GhRch37/hg19)	6		Neanderthal	Turkish; allele frequency = 0.09375	Vision	[93]
intergenic	rs61854810				Neanderthal	European ancestry (white race)	optic disc size; downregulation	[55]
Pathogens
HPV58 variants of oncogenes for papillomavirus	500 sites (6.4%) changed across the complete genome		whole genome	the majority of HPV58 variant genes are under purifying selection; while several codon sites under positive selection may affect viral phenotypes involved in facilitating host immune evasion, maintaining asymptomatic infection, or enhancing viral persistence and replication.	Neanderthal/Denisovan	East Asia, 10-18%	Papillomavirus agents	[45]
FAM114A1	archaic haplotype: 38763693-38906951 (GhRch37/hg19).		4	positive selection	Neanderthal		GWAS phenotype: Helicobacter pylori serologic status, Self-reported allergy; Adipose - Subcutaneous (upregulation), Breast - Mammary Tissue (upregulation), Cells - EBV-transformed lymphocytes (upregulation), Esophagus - Gastroesophageal Junction (upregulation), Esophagus - Mucosa (upregulation), Lung (upregulation), Muscle - Skeletal (upregulation), Pituitary (upregulation), Skin - Sun Exposed (L…	[36, 89]
TLR6	archaic haplotype: 38763693-38906951 (GhRch37/hg19).		4	The TLR6-TLR1-TLR10 cluster has been proposed to be a hotspot of positive selection in human and non-human primates and is detected as a strongly supported case of local adaptation in Europeans.	Neanderthal	Europeans: 16%, Asians: 49%	Innate immunity sensor; GWAS phenotype: Helicobacter pylori serologic status, Self-reported allergy; Adipose - Subcutaneous (downregulation), Breast - Mammary Tissue (downregulation), Cells - EBV-transformed lymphocytes (upregulation), Esophagus - Mucosa (downregulation), Muscle - Skeletal (downregulation), Pituitary (upregulation), Skin - Sun Exposed (Lower leg) (downregulation), Spleen (downreg…	[73, 89]
TLR10	archaic haplotype: 38763693-38906951 (GhRch37/hg19).		4	The TLR6-TLR1-TLR10 cluster has been proposed to be a hotspot of positive selection in human and non-human primates and is detected as a strongly supported case of local adaptation in Europeans.	Neanderthal	Europeans: 16%, Asians: 49%	GWAS phenotype: Helicobacter pylori serologic status, Self-reported allergy; Adrenal Gland (upregulation); innate immunity sensor	[73, 89]
Sexual development; fecundity
intergeic deletion	rs17188434SNP; position 157096996 in perfect LD with an indel in position 157099707 (GhRch37/hg19); minimum length of 180,900 bp for the introgressed segment		2		Neanderthal	Europeans (allele frequency = 0.06); East Asians (allele frequency = 0.01)	decrease in time to menarche, human carriers of the Neandertal allele showed an earlier menarche compared to non-carriers and the Neandertal allele	[53]
PTCHD3	frame shift insertion in position 27687534 (GhRch37/hg19)		10		Neanderthal	Europeans (allele frequency = 0.01); East Asians (allele frequency = 0.22)	the gene PTCHD3 (patched domain-containing protein-3) has a role in sperm development or sperm function and has been found to contain a risk-allele for asthma	[53]
ALPP			2	positive selection candidate	Denisovan	Tibetian	Associated with pregnancy losses.	[75]
DNALI1	rs41267319			purifying selection	Neanderthal	European ancestry (white race)	It encodes an axonemal dynein protein that functions in the sperm flagella. Highlighting the potential fitness consequences of introgression on testis-expressed genes, altered regulation of this gene set has been shown to contribute to hybrid incompatibility in other species.	[55]
AP000679.2	archaic haplotype: 120084221-120124302 (GhRch37/hg19).		11	positive selection	Neanderthal		Esophagus – Mucosa (downregulation), Uterus (upregulation).	[89]
OR2H1	archaic haplotype: 29275499-29401057 (GhRch37/hg19).		6	positive selection	Neanderthal		Testis (downregulation), Vagina (upregulation)	[89]
KLK3	non-synonymous archaic allele: 51361757 (GhRch37/hg19).		19	positive selection	Neanderthal		GWAS phenotype: Prostate-specific antigen levels	[89]
Facial features
intergenic indel	SNP rs10863790, position 209988047 in LD with indel in position 209987712 (GhRch37/hg19)		1		Neanderthal	Europeans (allele frequency = 0.01); East Asians (allele frequency = 0.43)	Cleft lip	[53]
SYT14	gene indel; SNP rs11119388, position 210174417 in LD with indel in position 210174981 (GhRch37/hg19)		1		Neanderthal	Europeans (allele frequency = 0.01); East Asians (allele frequency = 0.44)	Cleft lip	[36, 53]
IRF6	rs2235371				Neanderthal	European ancestry (white race)	Cleft lip; downregulation	[55]
Lung
intergenic	rs10187654; 234754506-234862040 (GhRch37/hg19)		2		Neanderthal	Turkish; allele frequency = 0.78125	Lung	[93]
MTMR3	rs36600; 30300112-30341260 (GhRch37/hg19)		22		Neanderthal	Turkish; allele frequency = 0.3125	Lung	[93]
CEP72	rs72705102		5		Neanderthal		Cystic fibrosis lung function; downregulation	[55]
GSTCD	rs10516526; archaic haplotype: 106508526-106814302 (GhRch37/hg19).		4		Neanderthal	Turkish; allele frequency = 0.09375; Europe.	Lung. GWAS phenotype: Pulmonary function, Pulmonary function (interaction); Pituitary (upregulation).	[89, 93]
INTS12	rs35370743				Neanderthal	European ancestry (white race)	pulmonary function (interaction with smoking)	[55]
OR10C1	archaic haplotype: 29275499-29401057 (GhRch37/hg19).		6	positive selection	Neanderthal		Artery – Tibial (upregulation), Lung (upregulation)	[89]
Kidney
CEP89	rs10418340; archaic haplotype: 33190467-33468482 (GhRch37/hg19).		19		Neanderthal	European ancestry (white race)	serum creatinine levels- downregulation. GWAS phenotype: Urinary metabolites; Minor Salivary Gland (upregulation), Muscle - Skeletal (downregulation), Pituitary (upregulation), Testis (downregulation), Vagina (upregulation).	[55, 89]
TDRD12	non-synonymous archaic allele: 33309030 (GhRch37/hg19).		19	positive selection	Neanderthal		GWAS phenotype: Urinary metabolites	[83]
Nonfunctional or unknown function
intergenic insertion	position 21068784 (GhRch37/hg19)		7		Neanderthal	Europeans (allele frequency = 0.01)		[53]
LINC01117	intronic insertion in position 177503917 (GhRch37/hg19)		2		Neanderthal	East Asians (allele frequency = 0.004)		[53]
Intergenic deletion	position 117649011 (GhRch37/hg19)		4		Neanderthal	Europeans (allele frequency = 0.04)		[53]
Intergenic deletion	position 72876666 (GhRch37/hg19)		13		Neanderthal	Europeans (allele frequency = 0.02)		[53]
RP1-272L16.1	Intronic deletion in position 209738399 (GhRch37/hg19)		1		Neanderthal	Europeans (allele frequency = 0.01); East Asians (allele frequency = 0.23)	lncRNA	[53]
Intergenic deletion	position 98096123 (GhRch37/hg19)		9		Neanderthal	East Asians (allele frequency = 0.04)		[53]
RP11-613D13.4	Downstream deletion in position 44026804 (GhRch37/hg19)		11		Neanderthal	Europeans (allele frequency = 0.001); East Asians (allele frequency = 0.03)		[53]
Intergenic deletion	position 99240729 (GhRch37/hg19)		14		Neanderthal	Europeans (allele frequency = 0.02)		[53]
RP11-72M17.1	Intronic deletion in position 66722909 (GhRch37/hg19)		14		Neanderthal	East Asians (allele frequency = 0.04)	lncRNA	[53]
RPL21P8	Upstream deletion in position 65936081 (GhRch37/hg19)		14		Neanderthal	Europeans (allele frequency = 0.003)	pseudogene	[53]
Intergenic deletion	position 107927163 (GhRch37/hg19)		8		Neanderthal	Europeans (allele frequency = 0.003)		[53]
Intergenic deletion	position 175215413 (GhRch37/hg19)		5		Neanderthal	Europeans (allele frequency = 0.008)		[53]
CTD-2281M20.1	Intronic deletion in position 117827264 (GhRch37/hg19)		5		Neanderthal	Europeans (allele frequency = 0.003); East Asians (allele frequency = 0.09)	lncRNA	[53]
LINC01029	Upstream deletion in position 75697997 (GhRch37/hg19)		18		Neanderthal	Europeans (allele frequency = 0.02); East Asians (allele frequency = 0.06)	lncRNA	[53]
Intergenic deletion	position 46966402 (GhRch37/hg19)		1		Neanderthal	East Asians (allele frequency = 0.05)		[53]
SCARNA11	Downstream insertion in position 14020411 (GhRch37/hg19)		1		Neanderthal	Europeans (allele frequency = 0.02); East Asians (allele frequency = 0.02)	scaRN	[53]
Intergenic deletion	position 94667080 (GhRch37/hg19)		11		Neanderthal	Europeans (allele frequency = 0.01)		[53]
intergenic insertion	position 52608156 (GhRch37/hg19)		5		Neanderthal	East Asians (allele frequency = 0.06)		[53]
Intergenic deletion	position 83216710 (GhRch37/hg19)		1		Neanderthal	East Asians (allele frequency = 0.03)		[53]
Intergenic deletion	position 218868860 (GhRch37/hg19)		1		Neanderthal	Europeans (allele frequency = 0.07); East Asians (allele frequency = 0.005)		[53]
Intergenic deletion	position 154878448 (GhRch37/hg19)		5		Neanderthal	East Asians (allele frequency = 0.05)		[53]
Regulatory insertion	position 169381200 (GhRch37/hg19)		3		Neanderthal	Europeans (allele frequency = 0.002); East Asians (allele frequency = 0.08)		[53]
RRM2P4	2.4-kb fragment on Xq27.3		X		Homo erectus	very common in East and Central Asia but is nearly absent in African samples	pseudogene	[37]
Teeth
ENAM	T648I (rs 7671281)		4	positive selection	Neanderthal and Denisovan	worldwide frequency=0.82; AFR frequency= 0.47, AMR frequency =0.89, EUR frequency=0.95, EAS frequency= 0.98, SAS frequency = 0.94	Enamelin is the protein playing an essential role in the proper formation of enamel and involved in enamel thickness. ENAM amino acid substitution T648I is associated with a thinner enamel and may explain the difference in dental size between populations with African and non-African origins. This variant may have contributed to the continuous decrease in enamel thickness from Plio-Pleistocene hom…	[29]
	T415I (rs779308123)		4		Neanderthal	EUR frequency= < 0.0001		[29]
	R429H (rs375758699)		4		Denisovan	worldwide frequency= 0.0005		[29]
	T951M (rs561402393)		4		Neanderthal	EAS frequency= 0.0001, SAS frequency= 0.0001		[29]
	G389S (rs74511578)		4		Neanderthal/archaic Homo	worldwide frequency= 0.013; AFR frequency=0.05; AMR frequency=0.003		[29]
MGP	A8V (rs142330429)		4		Neanderthal and Denisovan	worldwide frequency= 0.02, EUR frequency= 0.004, EAS frequency= 0.031, SAS frequency= 0.043	Matrix Gla protein is an essential extracellular matrix protein that exerts an inhibitory control on tissue calcification. Functional deficit or reduced expression of the protein lead to tissue over-mineralization. As MGP is expressed in kidney, lung and heart, in addition to bone and teeth, protein disfunction is associated with severe cardiovascular diseases. The archaic and derived polymorphis…	[29]
DMP1	R173Q (rs747698893)		4		Denisovan	EAS frequency= 0.0001; SAS frequency=0.001	Dentin matrix acidic phosphoprotein 1 is expressed in odontoblasts and osteoblasts and regulates cell differentiation and biomineralization of dentin and bones. The protein acts as a transcriptional factor regulating the expression of bone and dental genes, and also participates in phosphate homeostasis. The Neanderthal (N483T) or Denisova (R173Q) variants have not been shown involved in a partic…	[29]
	N483T (rs574215585)				Neanderthal	worldwide frequency= 0.004; AFR frequency = 0.001; SAS frequency = 0.02		[29]
CEMP1	R15Q (rs370735504)				Denisovan	worldwide frequency=0.0001; AMR frequency= 0.001; EAS frequency= 0.001	Cementum protein 1 is an extracellular matrix protein, is considered as a marker of cementum. It plays a role in the differentiation of cementoblasts, and in the mineralization process by promoting the deposition and growth of hydroxyapaptite crystals. It may have biological importance for tissue regeneration in periodontal disease. To our knowledge, no CEMP1 polymorphisms, including the variants…	[29]
	R80H (rs79379654)				Denisovan/archaic Homo	worldwide frequency=0.001; AFR frequency = 0.005		[29]
AMTN	R171H (rs117133443)		4		Denisovan	worldwide frequency= 0.0001	Enamel matrix protein expressed during the maturation stage of amelogenesis and was proposed to promote hydroxyapatite precipitation. Two AMTN amino acid changes (R171H, A200V) were detected in the Denisova individual only and may form a haplotype characteristic of this lineage. The variants are not located in protein domains conserved during mammalian evolution or harboring biological activity.	[29]
	A200V (rs376682442)		4		Denisovan	worldwide frequency= 0.004; SAS frequency = 0.02		[29]
AMBN	M273V (rs564905233)		4		Denisovan	worldwide frequency=0.001; SAS frequency = 0.003	Ameloblastin interacts with amelogenin and participates in enamel formation by a not yet elucidated mechanism. Nevertheless, AMBN plays an essential role in amelogenesis as demonstrated by the severe hypoplasia of knock-out mice. The two variants identified in Neanderthal Vi3315 (G78S) and in Denisova (M273V) individuals are not located into any functional or conserved domains of the protein.	[29]
	G78S (rs143795139)		4		archaic Homo	African frequency=0.0001
